# Supplementary material
Source: publisher figshare collection journal article supplement (https://aacr.figshare.com/articles/dataset/_/22430344)
Supplement: Supplementary file 1 [file 39876676]

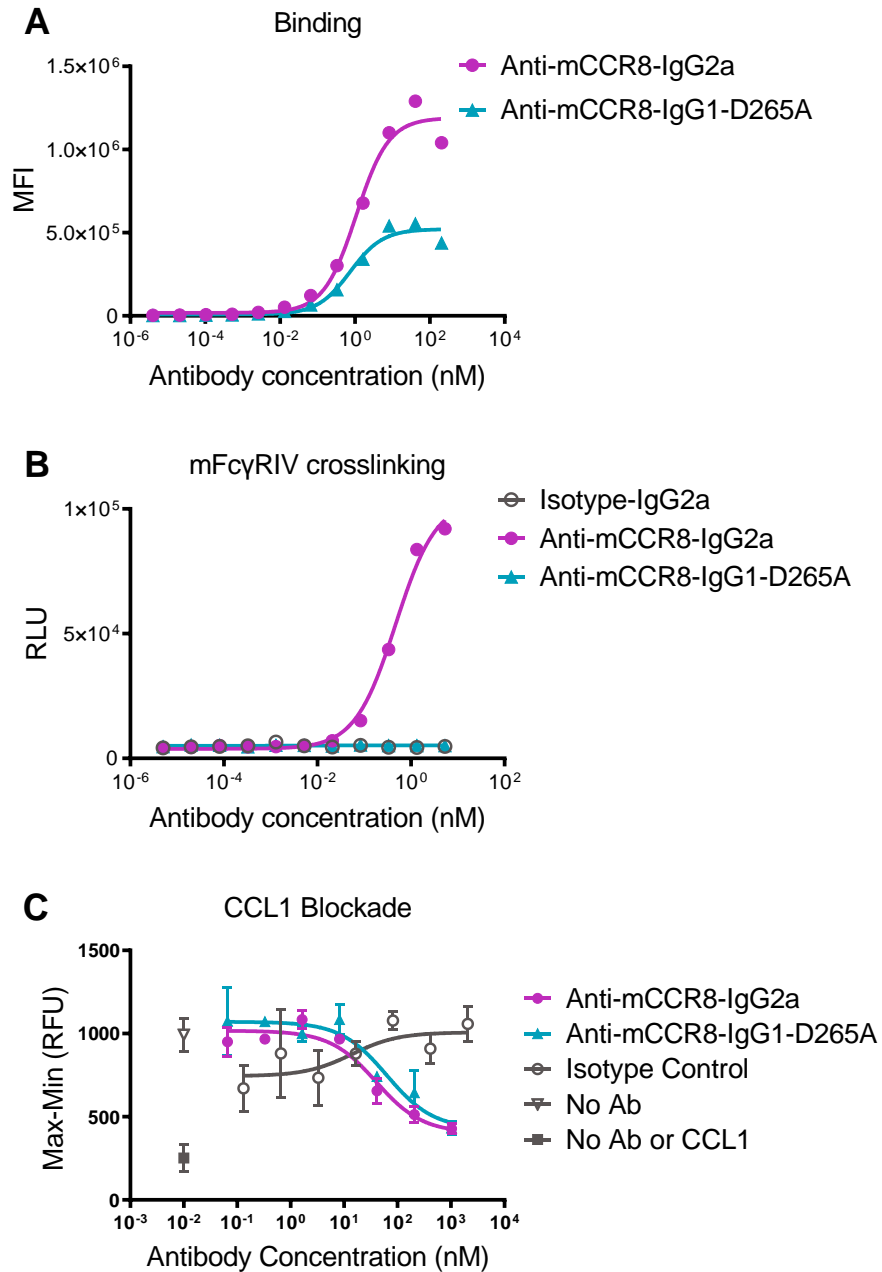

### Supplemental Figure 3: Binding, blocking and Fc engaging characteristics of anti-mouse CCR8 antibodies

(A) Binding of anti-mCCR8-IgG2a and anti-mCCR8-IgG1-D265A to CHO cells expressing mCCR8 (mCCR8-CHO). Binding EC<sub>50</sub> values were 1.1 and 0.74 nM for anti-mCCR8-IgG2a and anti-mCCR8-IgG1-D265A, respectively. (B) Fc $\gamma$ RIV cross-linking assay in the presence of anti-mCCR8-IgG2a, anti-mCCR8-IgG1-D265A or IgG2a isotype control antibodies with mCCR8-CHO as target cells. (C) CCL1 blocking assay with mCCR8-CHO with anti-mCCR8-mIgG2a (IC<sub>50</sub> = 39.8 nM), anti-mCCR8-IgG1-D265A (64.0 nM) or isotype antibodies. Non-linear regression (log[agonist] vs. response) was applied (A, B). Non-linear regression (log[antagonist] vs. response) was applied (C).
